# Supplementary material for: Mapping Transcriptomic Vector Fields of Single Cells
Source: bioRxiv or medRxiv preprint supplement (doi:10.1101/696724), 2021-02-09

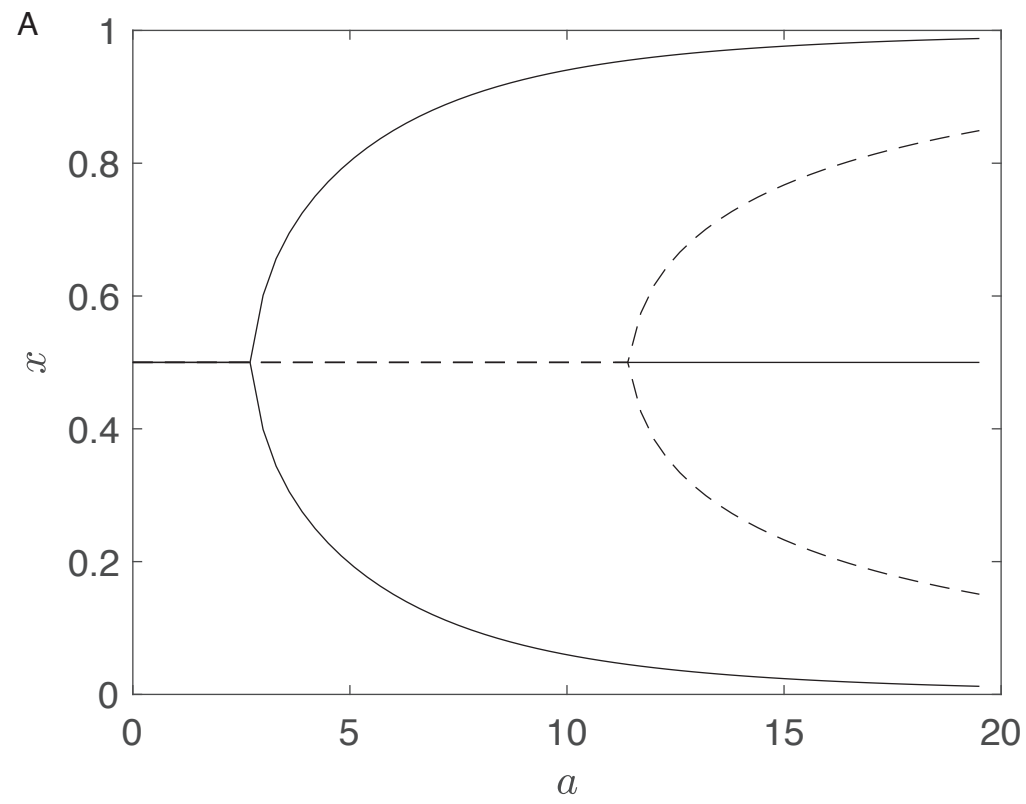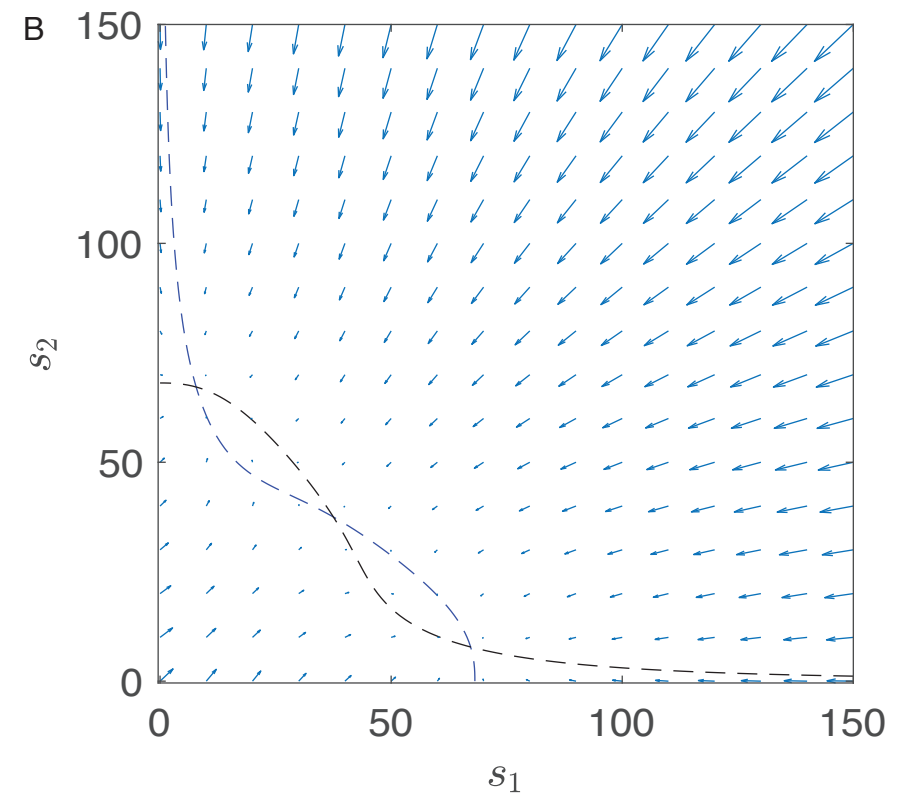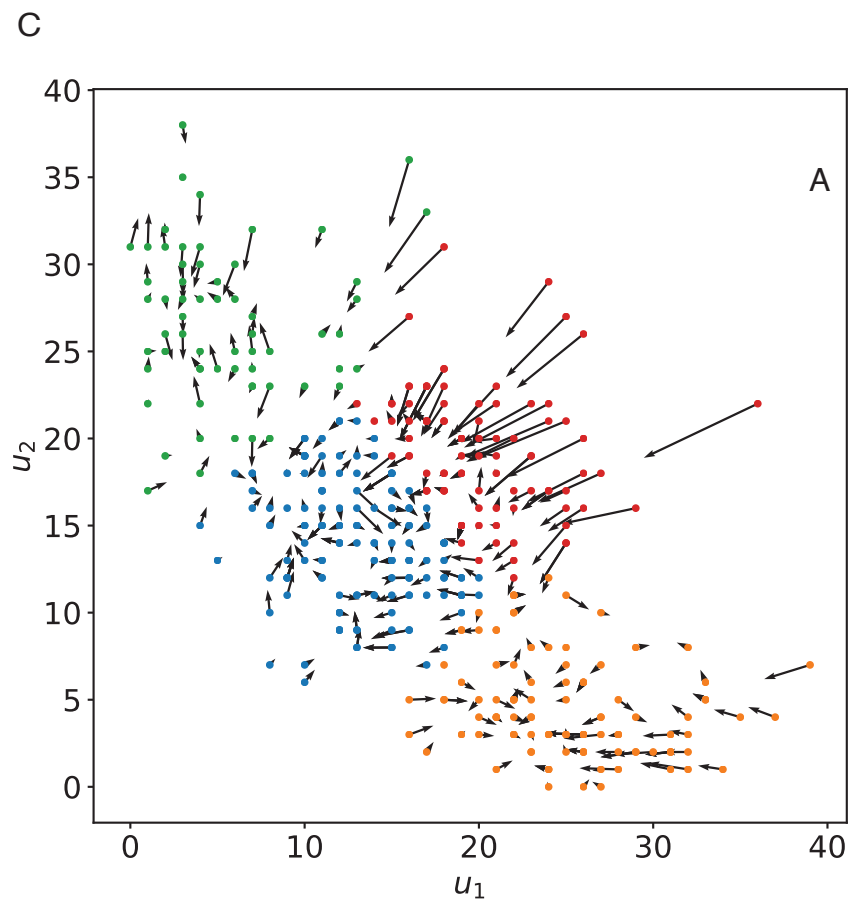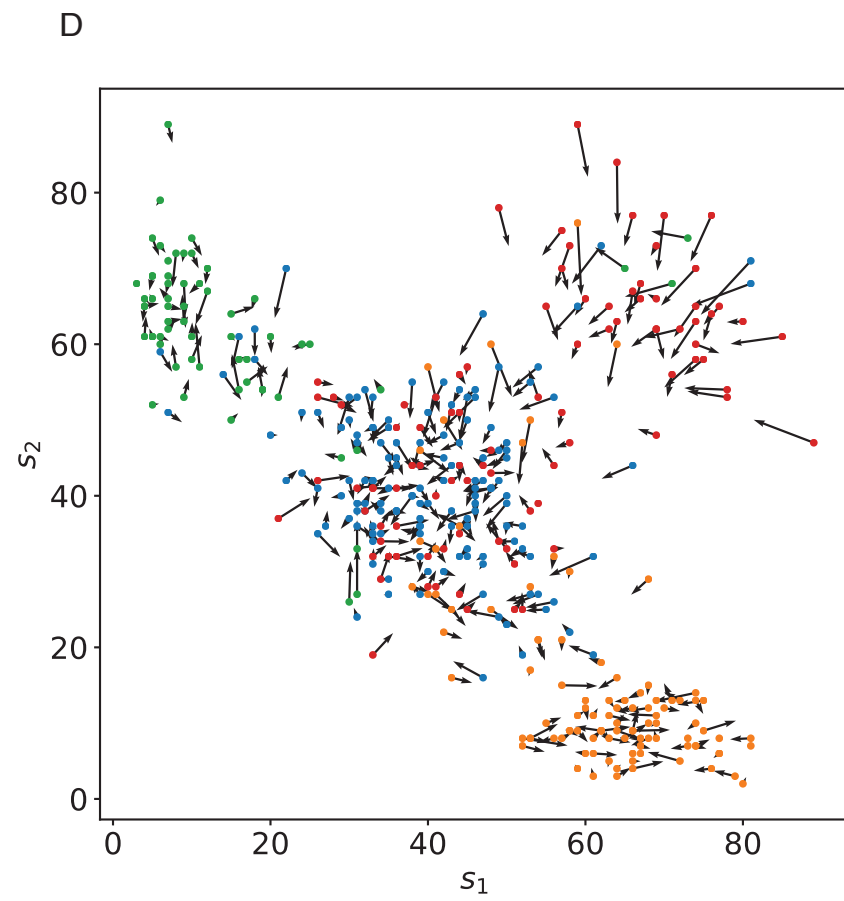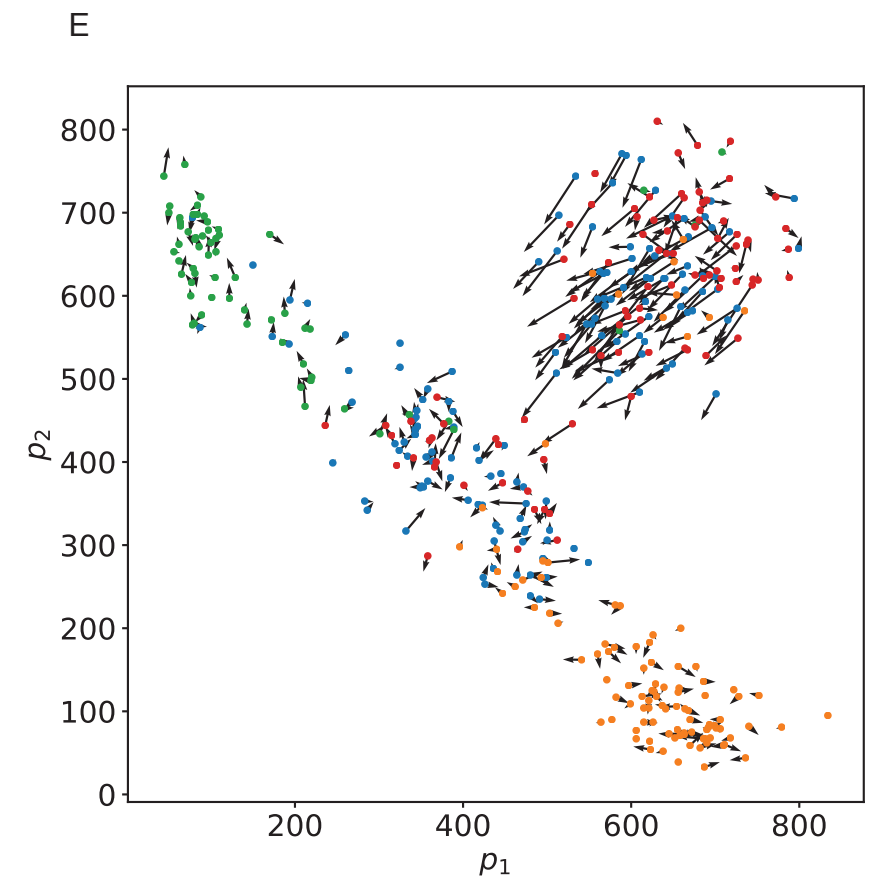

Supplement: Supplementary file [file media-1.pdf]
